# Supplementary material for: Interaction of organic compounds with chondritic silicate surfaces. Atomistic insights from quantum chemical periodic simulations
Source: Royal Society of Chemistry journal article supplement (doi:10.1039/c7cp03504g), 2017-01-01
Supplement: c7cp03504g1.pdf [file c7cp03504g1.pdf]

**Electronic Supplementary Information**

**Interaction of Organic Compounds with Chondritic Silicate Surfaces.**

**Atomistic Insights from Quantum Chemical Periodic Simulations**

Albert Rimola<sup>1\*</sup>, Josep M. Trigo-Rodríguez<sup>2</sup> and Zita Martins<sup>3</sup>

<sup>1</sup> Departament de Química, Universitat Autònoma de Barcelona, 08193 Bellaterra,  
Spain

<sup>2</sup> Institut de Ciències de l'Espai (CSIC-IEEC), Campus UAB, Barcelona, Spain

<sup>3</sup> Department of Earth Science and Engineering, Imperial College London, London, UK

**E-mail corresponding author:** [albert.rimola@uab.cat](mailto:albert.rimola@uab.cat)

**Table S1.** Contractions of the basis set employed in the work. Double- $\zeta^*$  basis set were used to perform geometry optimizations and frequency calculations, triple- $\zeta^*$  basis set for single point energy calculations to refine the adsorption energies.

| Atom         | double- $\zeta^*$ | triple- $\zeta^*$     |
|--------------|-------------------|-----------------------|
| Si           | (8s)–(831sp)–(1d) | (8s)–(6311sp)–(1d)    |
| Mg           | (8s)–(61sp)–(1d)  | (8s)–(511sp)–(1d)     |
| O (surface)  | (6s)–(31sp)–(1d)  | (8s)–(411sp)–(1d)     |
| H            | (31s)–(1p)        | (311s)–(1p)           |
| C            | (6s)–(31sp)–(1d)  | (511111s)–(411p)–(1d) |
| N            | (6s)–(31sp)–(1d)  | (511111s)–(411p)–(1d) |
| O (molecule) | (6s)–(31sp)–(1d)  | (511111s)–(411p)–(1d) |
